# Supplementary material for: Regulating the Electrical and Mechanical Properties of TaS2 Films via van der Waals and Electrostatic Interaction for High Performance Electromagnetic Interference Shielding
Source: PubMed Central journal article supplement (PMC10113419; doi:10.1007/s40820-023-01061-1), 2023-04-18
Supplement: 40820_2023_1061_MOESM1_ESM.pdf [file 40820_2023_1061_MOESM1_ESM.pdf]

Supporting Information for

## **Regulating the Electrical and Mechanical Properties of TaS<sub>2</sub> Films via van der Waals and Electrostatic Interaction for High Performance Electromagnetic Interference Shielding**

Fukang Deng<sup>1</sup>, Jianhong Wei<sup>1,2</sup>, Yadong Xu<sup>1</sup>, Zhiqiang Lin<sup>1</sup>, Xi Lu<sup>1</sup>, Yan-Jun Wan<sup>1</sup>, Rong Sun<sup>1,\*</sup>, Ching-Ping Wong<sup>3</sup>, and Yougen Hu<sup>1,\*</sup>

<sup>1</sup> Shenzhen Institute of Advanced Electronic Materials, Shenzhen Institute of Advanced Technology, Chinese Academy of Sciences, Shenzhen 518055, P. R. China

<sup>2</sup> Shenzhen Geim Graphene Center, Institute of Materials Research, Shenzhen International Graduate School, Tsinghua University, Shenzhen 518055, P. R. China

<sup>3</sup> School of Materials Science and Engineering, Georgia Institute of Technology, Atlanta, GA 30332, USA

\*Corresponding authors. E-mail: [yg.hu@siat.ac.cn](mailto:yg.hu@siat.ac.cn) (Yougen Hu); [rong.sun@siat.ac.cn](mailto:rong.sun@siat.ac.cn) (Rong Sun)

### **Supplementary Figures and Tables**

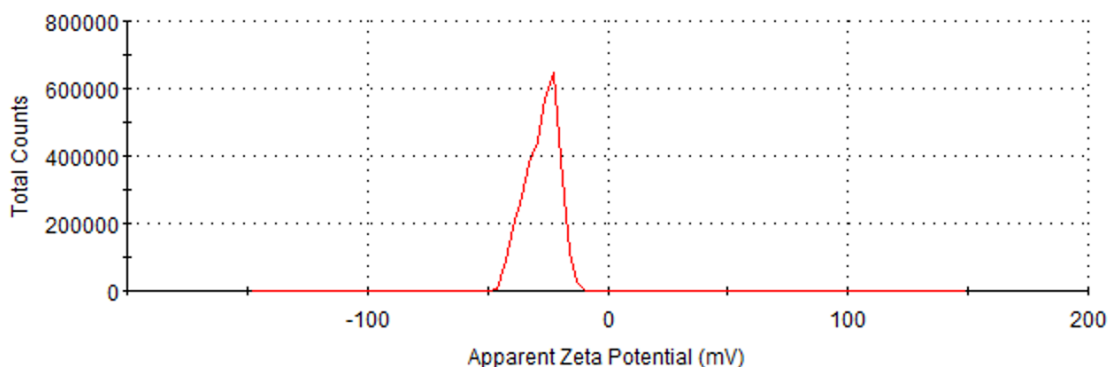

**Fig. S1** The Zeta potential of TaS<sub>2</sub> nanosheets aqueous dispersions ( $\sim 0.1 \text{ mg mL}^{-1}$ ), showed a value of  $-27.4 \text{ mV}$

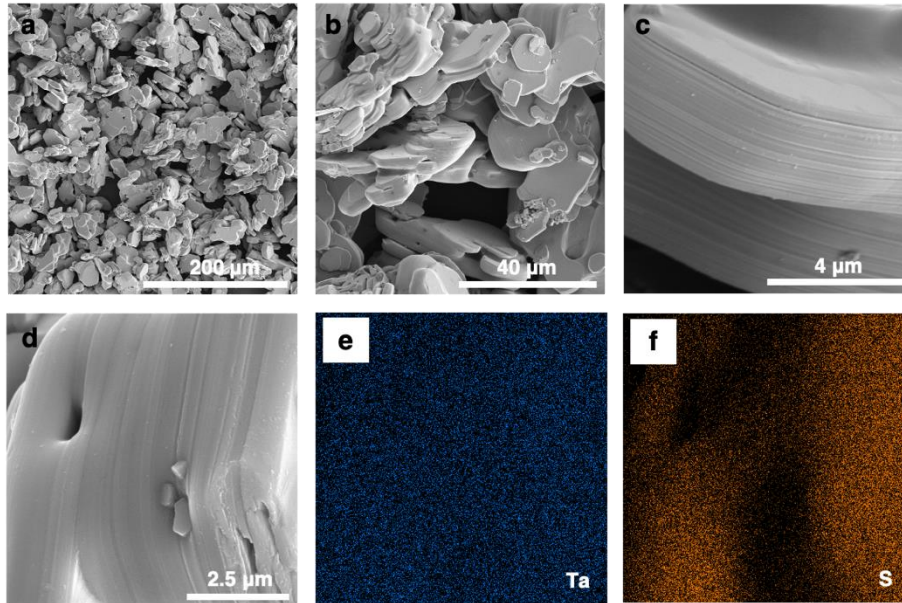

**Fig. S2** a-d SEM images of bulk 2H-TaS<sub>2</sub>. e, f EDS elemental mapping of bulk 2H-TaS<sub>2</sub>.

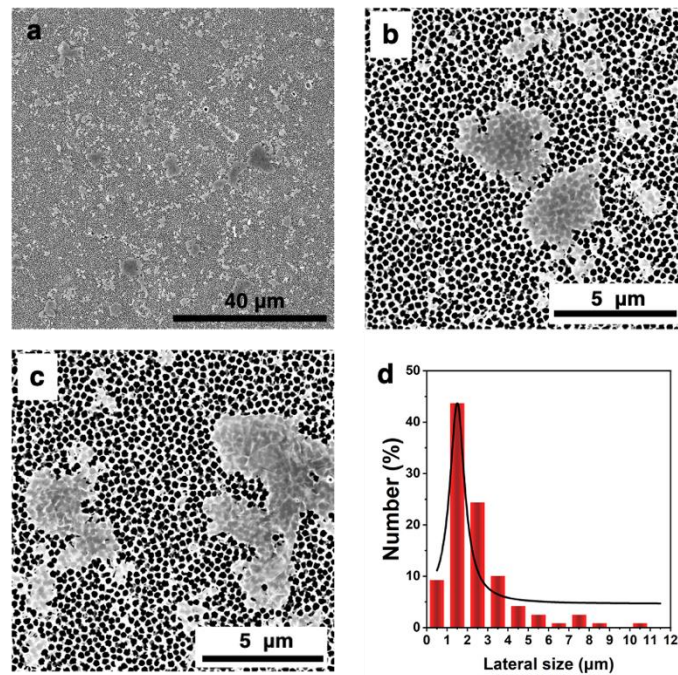

**Fig. S3** Calculation of lateral size of 2H-TaS<sub>2</sub> nanosheets. a-c SEM images of 2H-TaS<sub>2</sub> nanosheets. d Lateral size distribution of 2H-TaS<sub>2</sub> nanosheets indicates that the average lateral size of 2H-TaS<sub>2</sub> nanosheets is roughly 1.5 μm

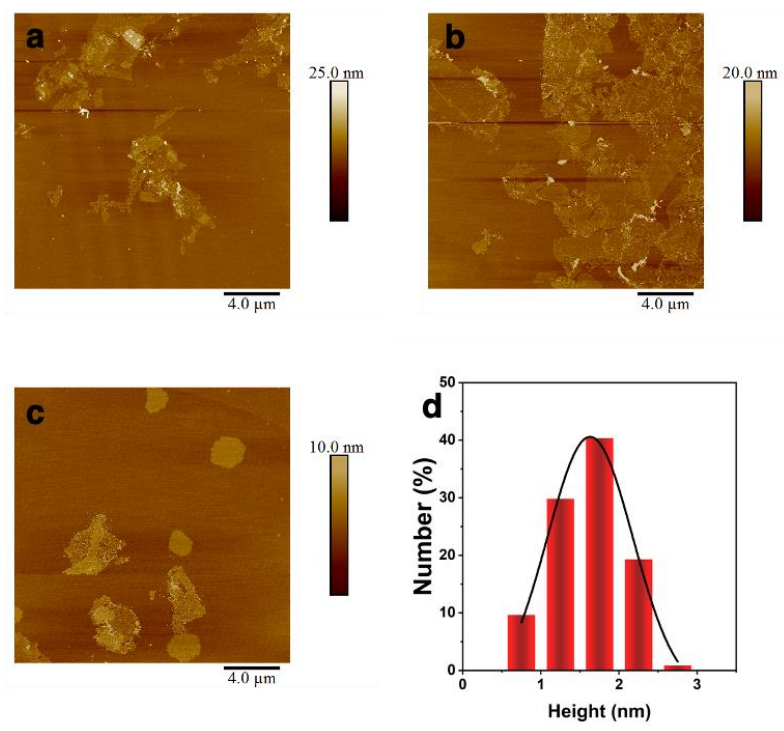

**Fig. S4** Thickness of 2H-TaS<sub>2</sub> nanosheets. **a-c** AFM images of 2H-TaS<sub>2</sub> nanosheets. **d** Height distribution of 2H-TaS<sub>2</sub> nanosheets, indicating that the average thickness of 2H-TaS<sub>2</sub> nanosheets is roughly 1.74 nm

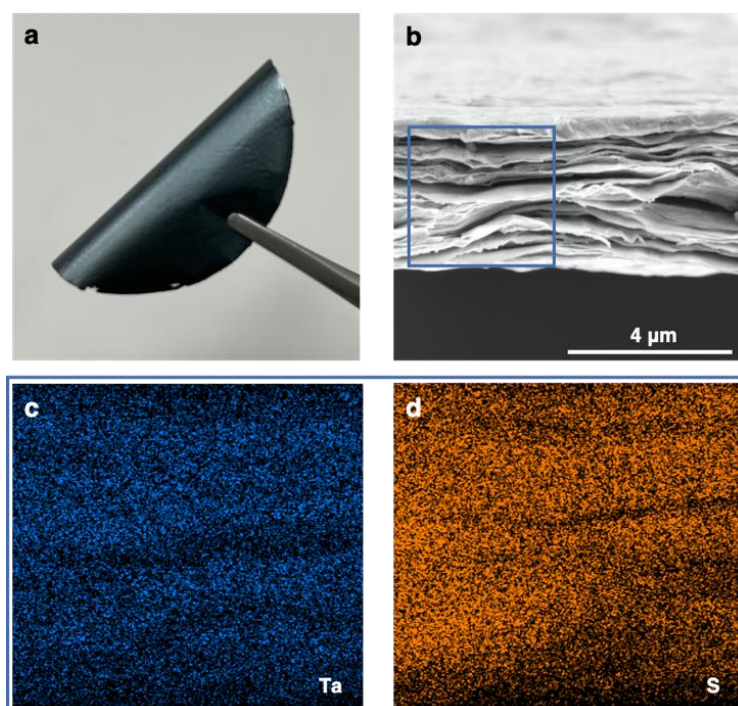

**Fig. S5** Morphology of TaS<sub>2</sub> freestanding film. **a** Photograph of TaS<sub>2</sub> freestanding film exhibiting its flexibility. **b** SEM image of the fracture surface of the TaS<sub>2</sub> freestanding film. **c**, **d** EDS mapping of elements Ta and S for the area outlined in figure S5b

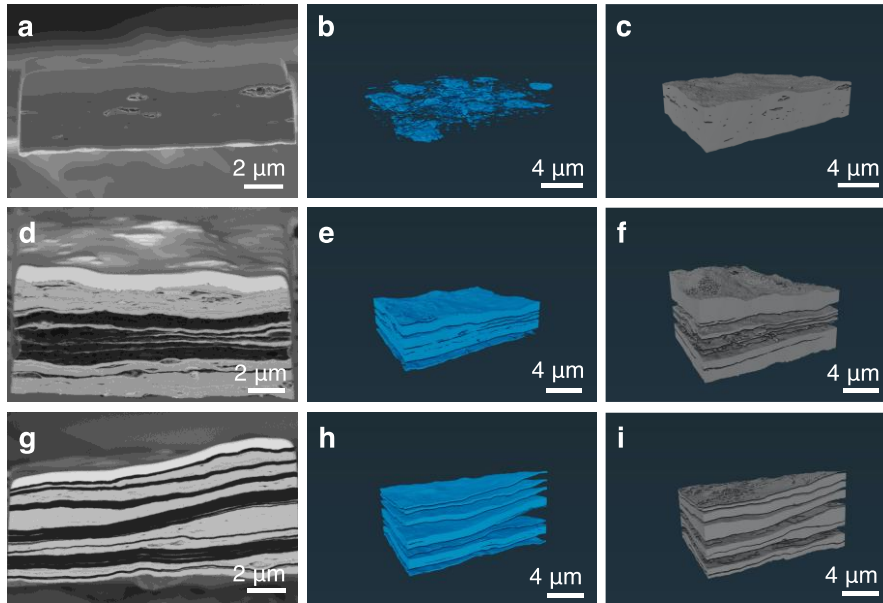

**Fig. S6** FIB/SEM cross-sectional of TaS<sub>2</sub>, TaS<sub>2</sub>/BC (10:1), and TaS<sub>2</sub>/ANFs (10:1) films. A cross-sectional derived from FIB/SEM for **a** TaS<sub>2</sub> freestanding film, **d** TaS<sub>2</sub>/BC (10:1) composite film, and **g** TaS<sub>2</sub>/ANFs (10:1) composite film. The volumes of **b** voids and **c** TaS<sub>2</sub> derived from FIB/SEM for TaS<sub>2</sub> freestanding film are 33.8162 μm<sup>3</sup> and 563.087 μm<sup>3</sup> respectively, with a porosity of 6.01%. The volumes of **e** BC and **f** TaS<sub>2</sub> derived from FIB/SEM for TaS<sub>2</sub>/BC (10:1) composite film are 410.809 μm<sup>3</sup> and 1334.81 μm<sup>3</sup> respectively, with a volume rate of 30.78%. The volumes of **h** ANFs and **i** TaS<sub>2</sub> derived from FIB/SEM for TaS<sub>2</sub> /ANFs (10:1) composite film are 640.916 μm<sup>3</sup> and 1609.96 μm<sup>3</sup> respectively, with a volume rate of 39.81%

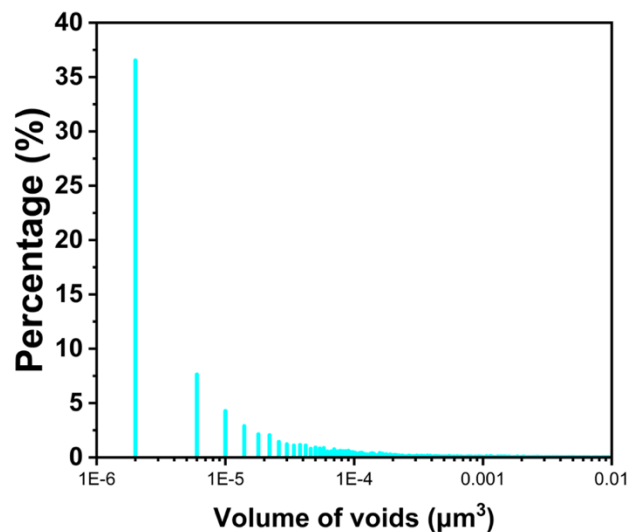

**Fig. S7** Volume distribution of 3D reconstructed voids derived from FIB/SEM for TaS<sub>2</sub> freestanding film



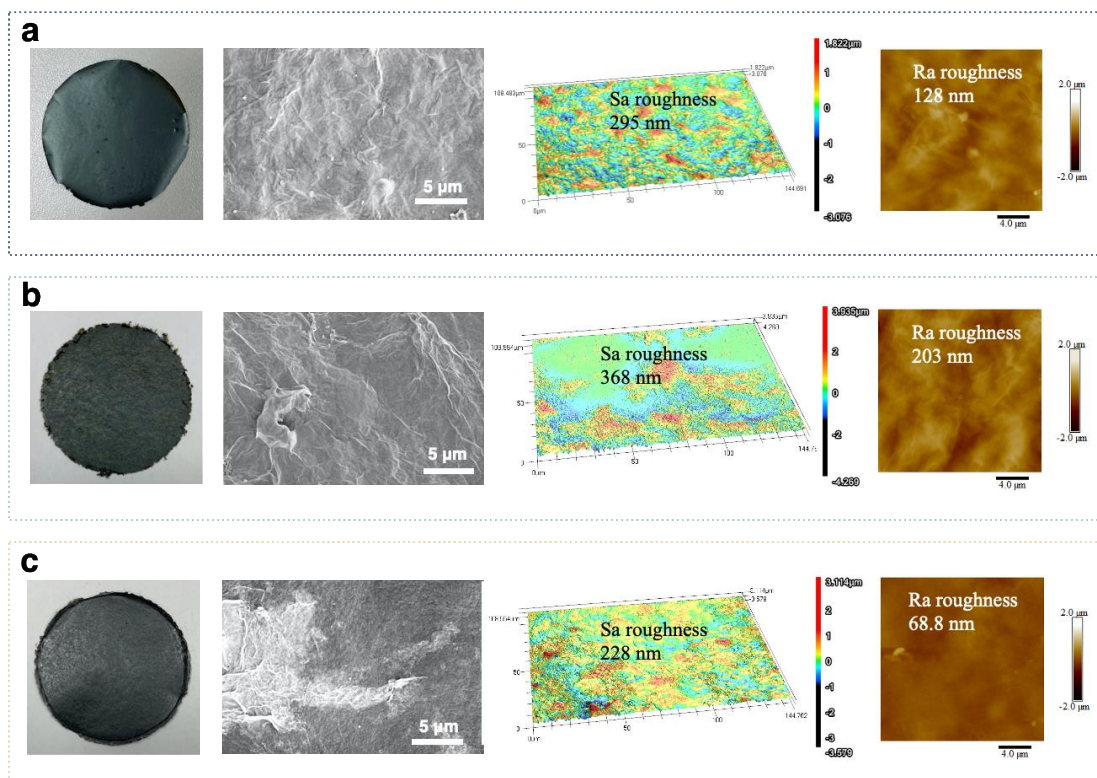

**Fig. S8** Digital photographs and SEM, 3D, and AFM images for the top surface for **a** TaS<sub>2</sub> freestanding film, **b** TaS<sub>2</sub>/BC (10:5) composite film, **c** TaS<sub>2</sub>/ANFs (10:5) composite film

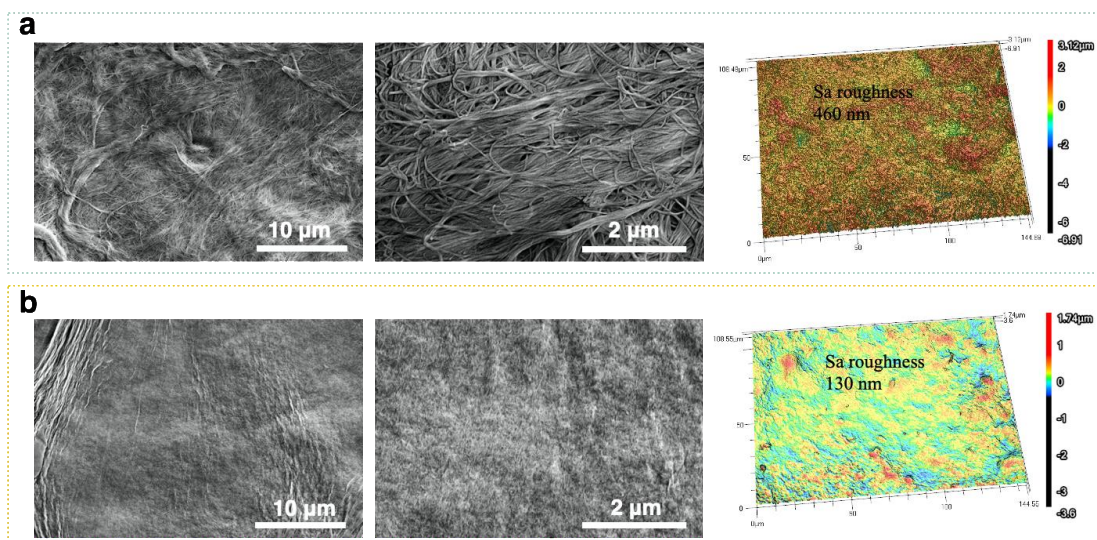

**Fig. S9** SEM and 3D images for the top surface for **a** the pure BC and **b** ANFs films

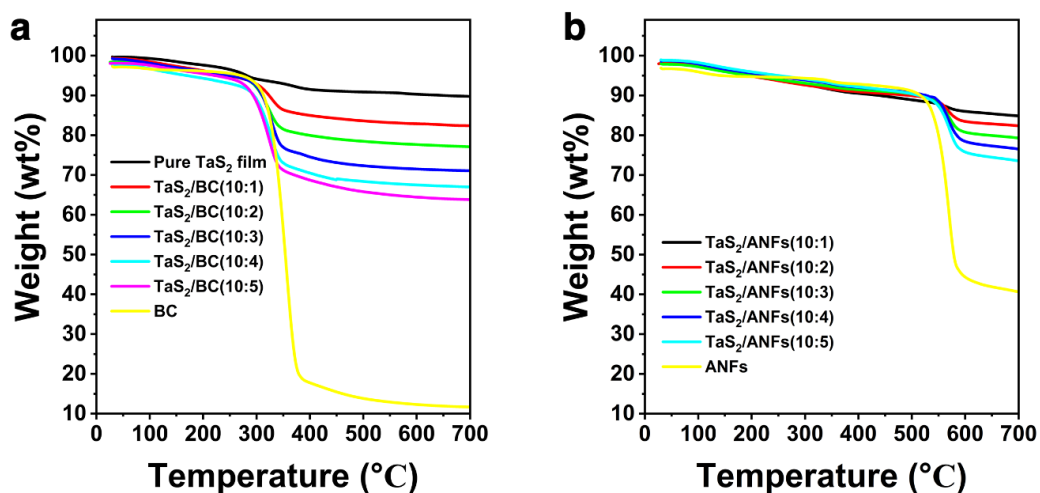

**Fig. S10** TGA curves. **a** TaS<sub>2</sub> freestanding film and TaS<sub>2</sub>/BC composite films **b** TaS<sub>2</sub>/ANFs composite films. The TGA characterizations were performed from 30 to 700 °C at a temperature rising rate of 10 °C/min under a nitrogen atmosphere

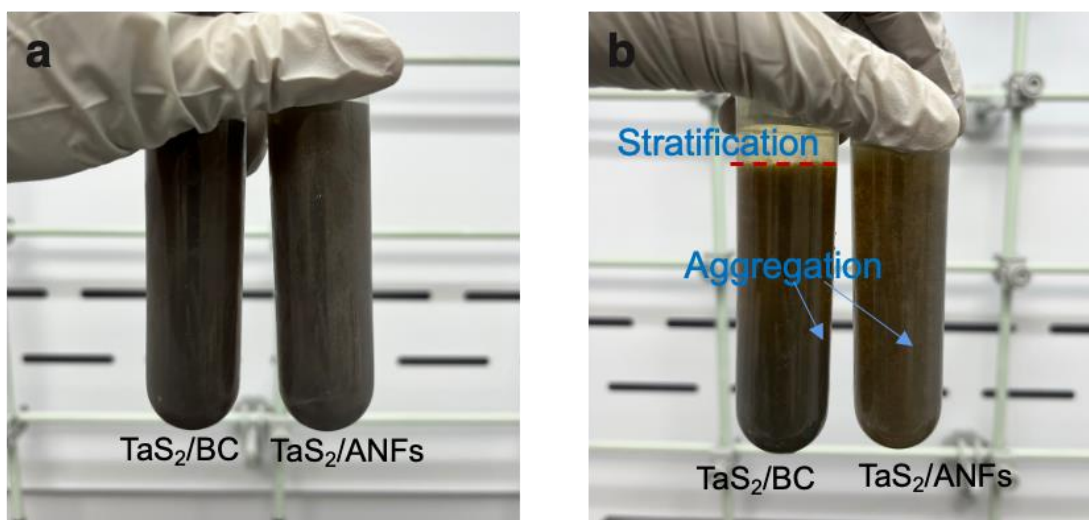

**Fig. S11** The images of TaS<sub>2</sub>/BC and TaS<sub>2</sub>/ANFs dispersion **a** before and **b** after acid treatment

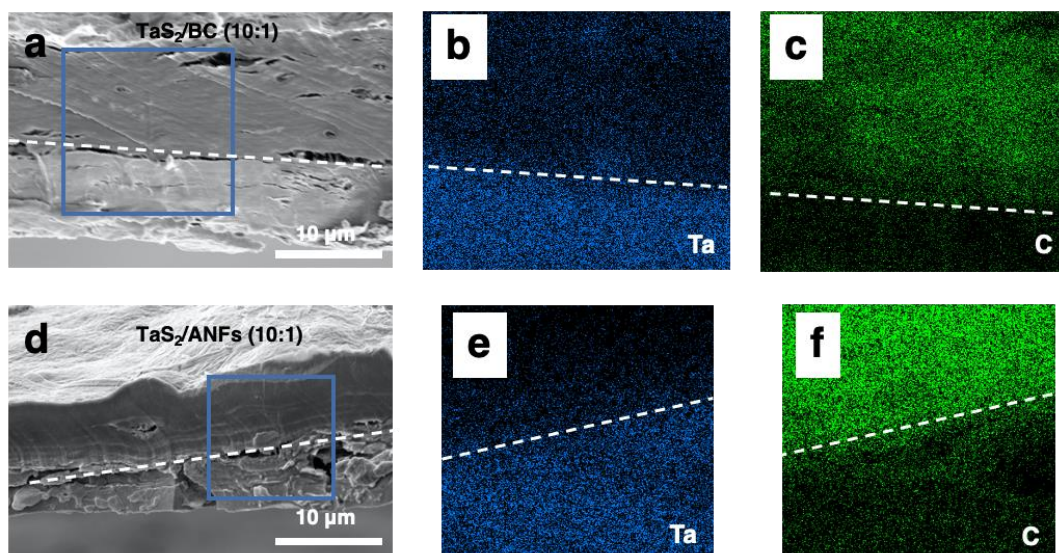

**Fig. S12** Morphology of TaS<sub>2</sub>/BC and TaS<sub>2</sub>/ANFs films without acid treatment

SEM image of the section of **a** the TaS<sub>2</sub>/BC and **d** TaS<sub>2</sub>/ANFs films. Corresponding EDS mapping of elements Ta and C for the area outlined in **a**, **d** for **b**, **c** TaS<sub>2</sub>/BC and **e**, **f** TaS<sub>2</sub>/ANFs composite films.

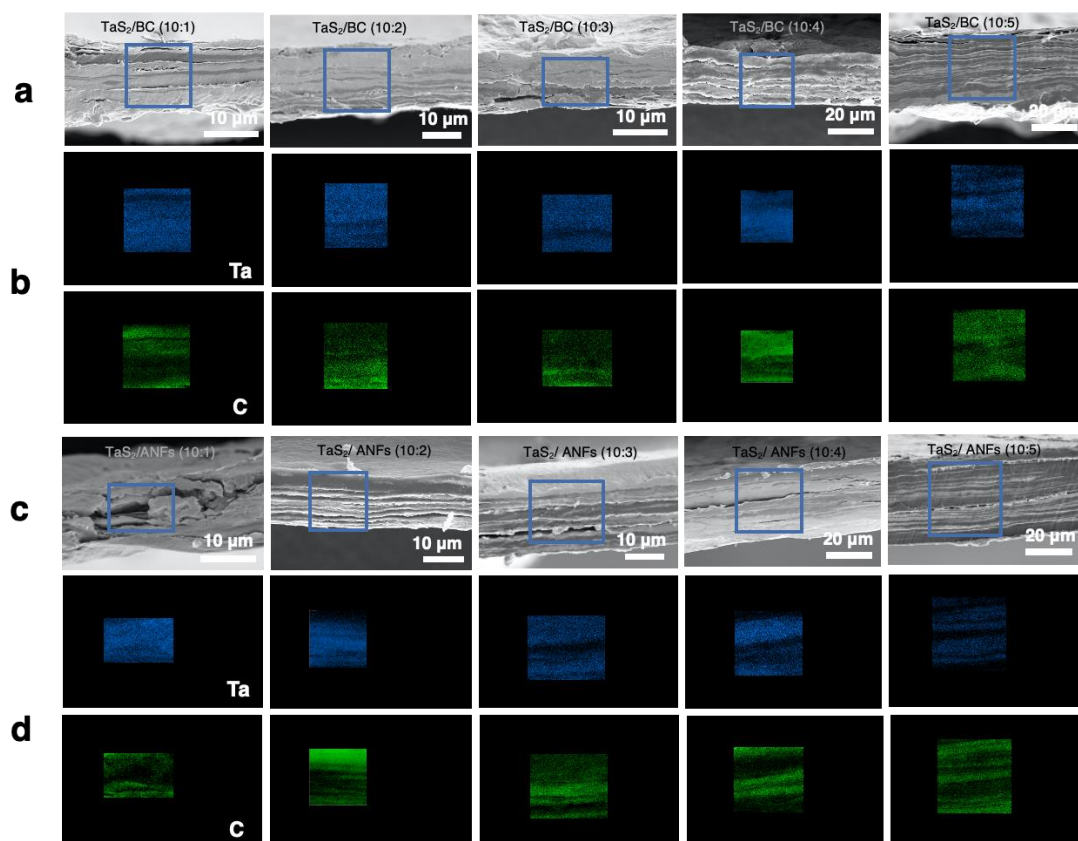

**Fig. S13** Morphology of TaS<sub>2</sub>/BC and TaS<sub>2</sub>/ANFs composite films with HCl treatment. SEM images of the section of the **a** TaS<sub>2</sub>/BC and **c** TaS<sub>2</sub>/ANFs films. Corresponding EDS mapping of elements Ta and C for the area outlined in **a**, **c** for **b** TaS<sub>2</sub>/BC and **d** TaS<sub>2</sub>/ANFs films



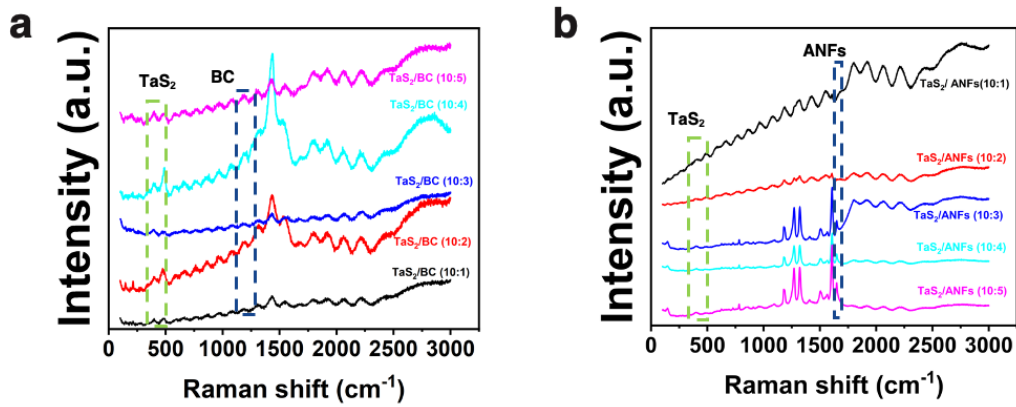

Fig. S14 Raman spectra of **a** TaS<sub>2</sub>/BC and **b** TaS<sub>2</sub>/ANFs composite films

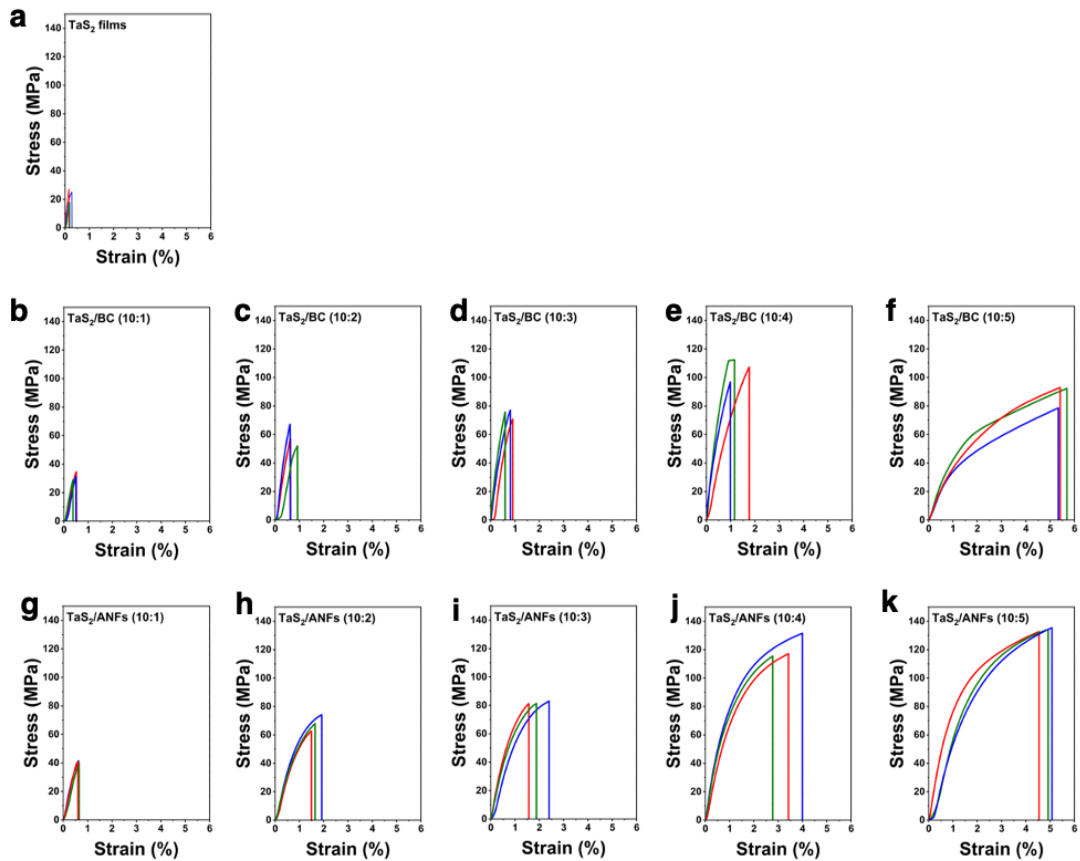

Fig. S15 Tensile stress–strain curves of the films. **a** TaS<sub>2</sub> freestanding film, **b–f** TaS<sub>2</sub>/BC (10:1) to TaS<sub>2</sub>/BC (10:5) composite films, **g–k** TaS<sub>2</sub>/ANFs (10:1) to TaS<sub>2</sub>/ANFs (10:5) composite films



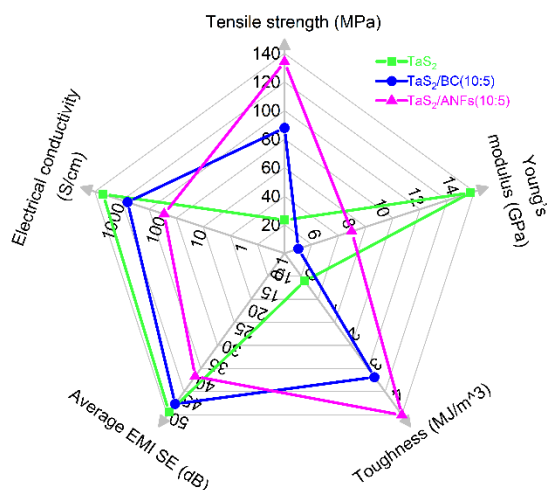

**Fig. S16** A radial plot comparing the tensile strength, Young's modulus, toughness, electrical conductivity, and EMI SE of TaS<sub>2</sub> freestanding film, TaS<sub>2</sub>/BC (10:5) composite film, and TaS<sub>2</sub>/ANFs (10:5) composite film

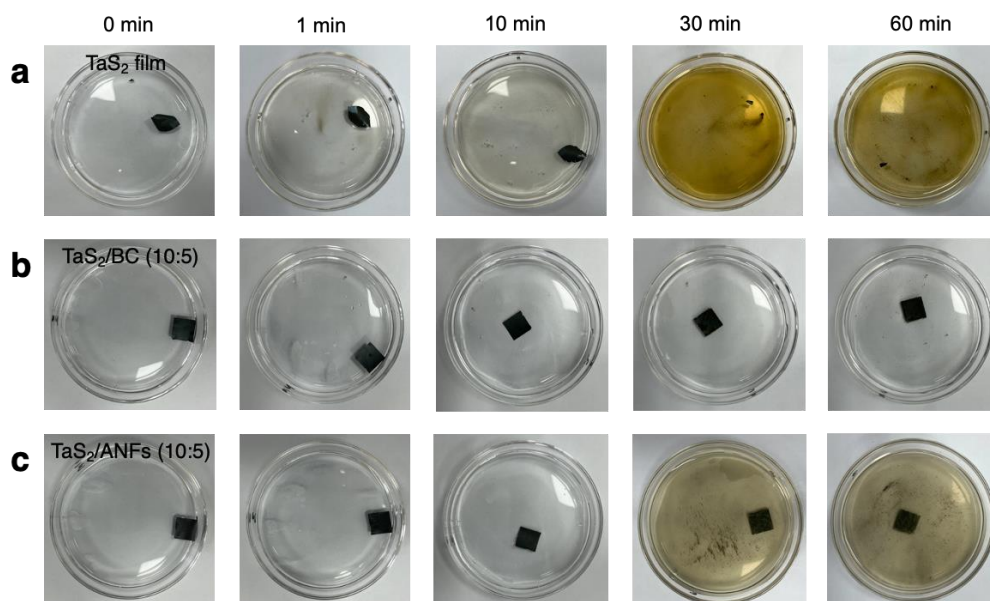

**Fig. S17** Photographs of the films during ultrasonication (using a 500 W, 40 kHz sonicator) in water. **a** TaS<sub>2</sub> freestanding film, **b** TaS<sub>2</sub>/BC (10:5) composite film, **c** TaS<sub>2</sub>/ANFs (10:5) composite film. The TaS<sub>2</sub> freestanding film, TaS<sub>2</sub>/BC (10:5) composite film, and TaS<sub>2</sub>/ANFs (10:5) composite film begin to disintegrate after ultrasonication for 1, 30, and 30 min, respectively

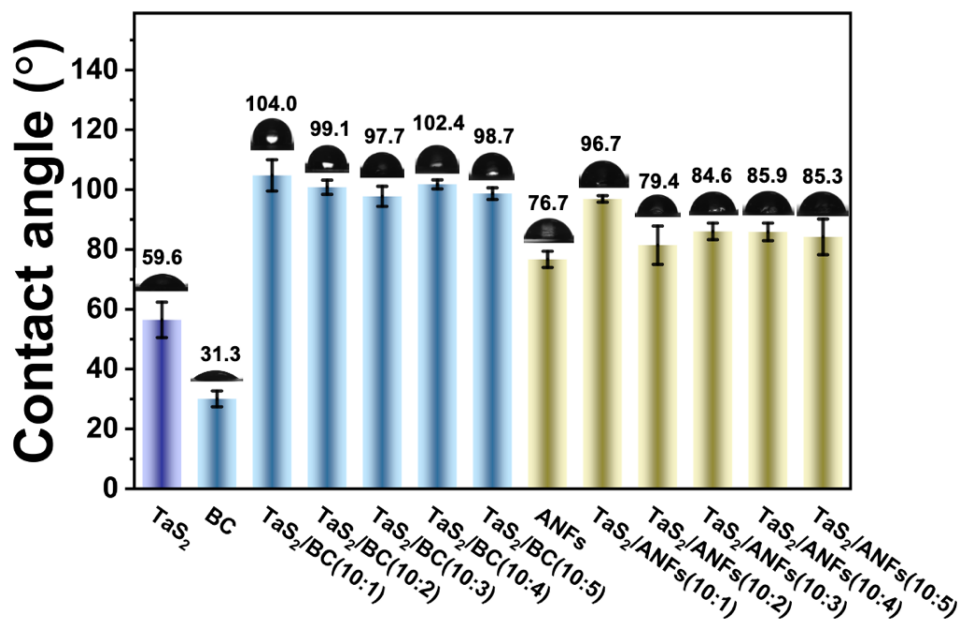

**Fig. S18** Wettability of TaS<sub>2</sub> freestanding film, TaS<sub>2</sub>/BC composite films, and TaS<sub>2</sub>/ANFs composite film toward water. The possible reason for the increase of the contact angle of the composite films is the change of the films surface structure

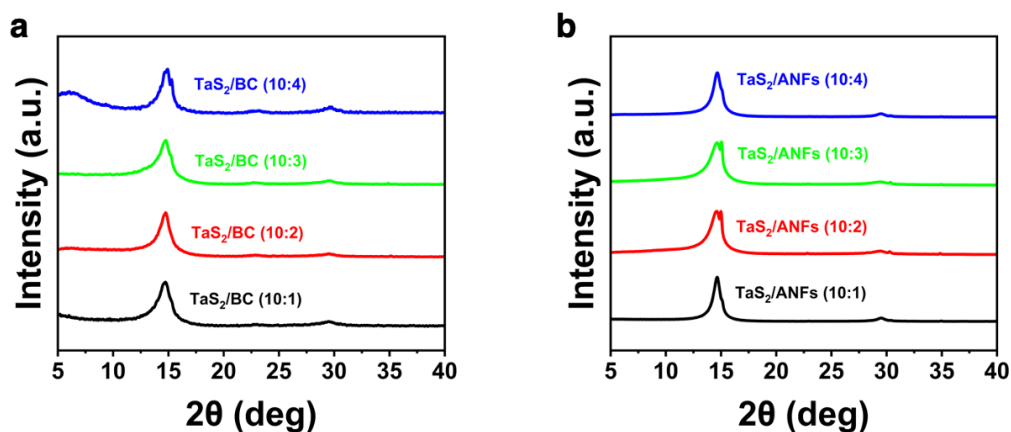

**Fig. S19** XRD curves using Cu-K $\alpha$  radiation. Normalized XRD patterns of **a** TaS<sub>2</sub>/BC composite films and **b** TaS<sub>2</sub>/ANFs composite films, Zoom-in of the XRD patterns in the range of 5-40 deg

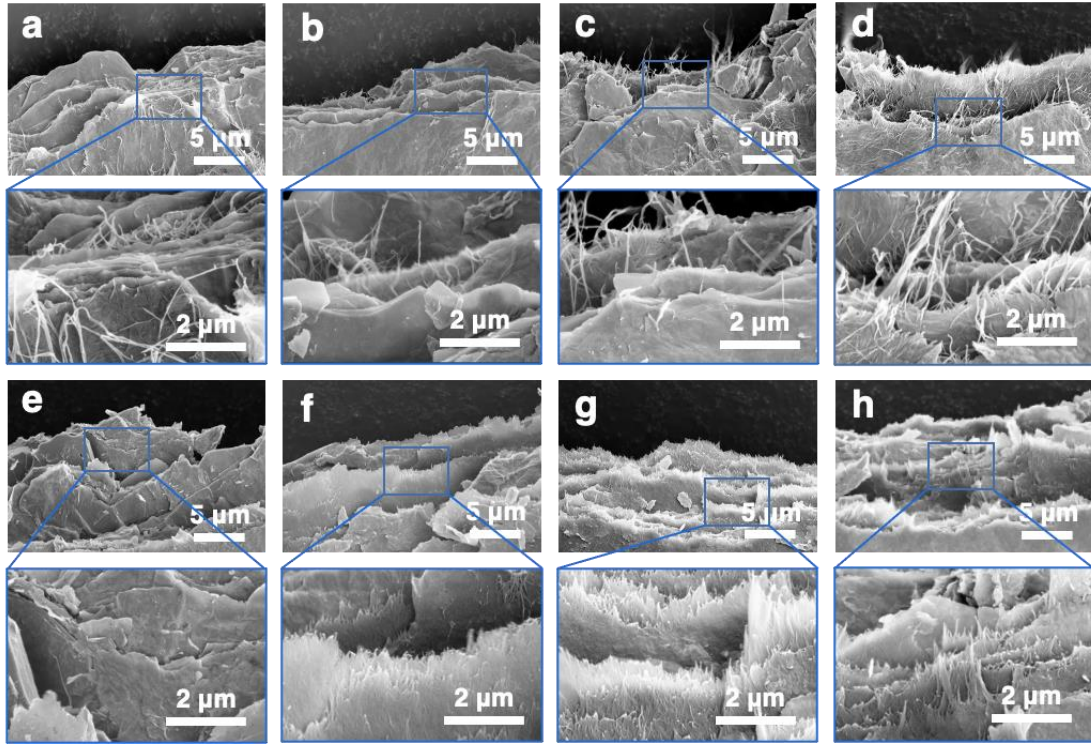

**Fig. S20** Inclined-view SEM images of the fracture surface of the composite films. **a-d** TaS/BC (10:1) to (10:4), and **e-h** TaS<sub>2</sub>/ANFs (10:1) to (10:4). The TaS<sub>2</sub>/BC and TaS<sub>2</sub>/ANFs films have fiber distribution at the fracture edge

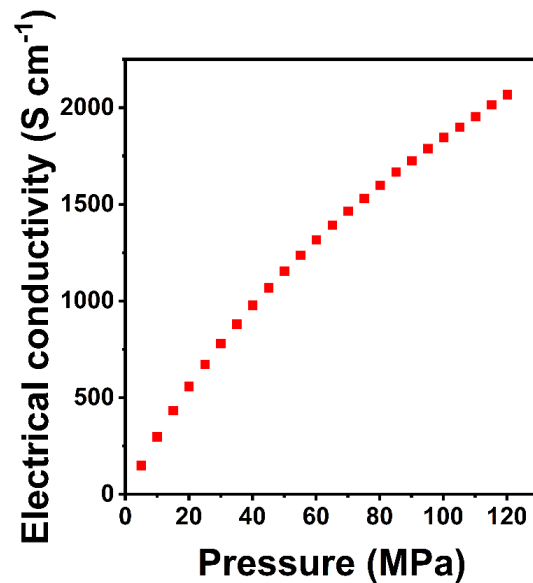

**Fig. S21** The electrical conductivity of 2H-TaS<sub>2</sub> powder corresponding to the pressure. The electrical conductivity of 2H-TaS<sub>2</sub> powder increases with the increase of pressure and reaches 2,067 S cm<sup>-1</sup> at a high pressure of 120 MPa

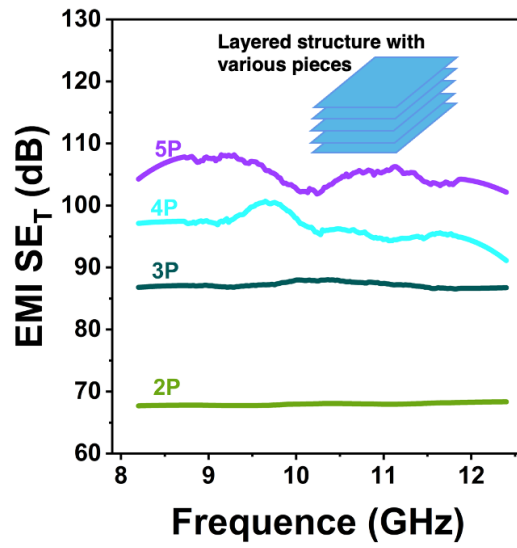

**Fig. S22** EMI SE of the multi-level superimposed of TaS<sub>2</sub> films. 2P (~16 μm) indicated the superposition of two 8-μm-thick TaS<sub>2</sub> films; 3P (~36 μm) indicated the superposition of 10-μm-thick and two 13-μm-thick TaS<sub>2</sub> films; 4P (~42 μm) indicated the superposition of two 8-μm-thick and two 13-μm-thick TaS<sub>2</sub> films; 5P (~52 μm) indicated the superposition of two 8-μm-thick and 10-μm-thick and two 13-μm-thick TaS<sub>2</sub> films. The average EMI SE of TaS<sub>2</sub> film thickness of 2P, 3P, 4P, and 5P are 68.0 dB, 87.2 dB, 96.4 dB, and 105.2 dB respectively

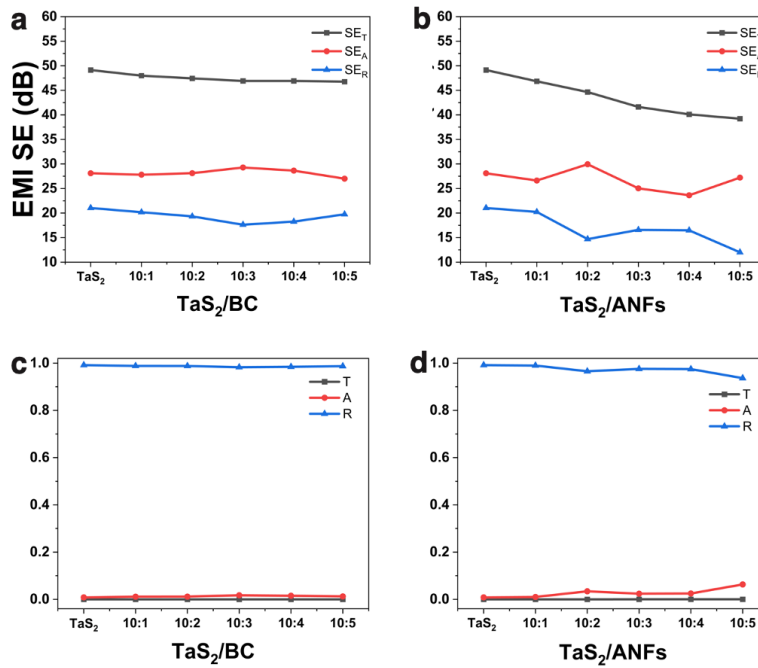

**Fig. S23 a, b** EMI SE<sub>T</sub>, SE<sub>A</sub>, and SE<sub>R</sub> of 7.5-μm-thick TaS<sub>2</sub> film, TaS<sub>2</sub>/BC composite film, and TaS<sub>2</sub>/ANFs composite film. **c, d** The transmission (T), absorption (A), and reflection (R) coefficient of 7.5-μm-thick TaS<sub>2</sub> film, TaS<sub>2</sub>/BC composite film, and TaS<sub>2</sub>/ANFs composite film. (Note: TaS<sub>2</sub> content is the same)

**Table S1** Chemical compositions of the Li<sub>x</sub>Ta<sub>y</sub>S<sub>z</sub> nanosheets



|                                    | <b>x</b> | <b>y</b> | <b>z</b> | <b>Chemical formula</b>        |
|------------------------------------|----------|----------|----------|--------------------------------|
| $\text{Li}_x\text{Ta}_y\text{S}_z$ | 0.051599 | 0.287759 | 0.592451 | $\text{Li}_{0.18}\text{TaS}_2$ |

**Table S2** BC and ANFs content in  $\text{TaS}_2/\text{BC}$  and  $\text{TaS}_2/\text{ANFs}$  composite films, determined by TGA measurements

| <b>Sample</b>                     | <b>BC content (wt%)</b> | <b>ANFs content (wt%)</b> |
|-----------------------------------|-------------------------|---------------------------|
| $\text{TaS}_2/\text{BC}$ (10:1)   | 9.44                    | -                         |
| $\text{TaS}_2/\text{BC}$ (10:2)   | 16.21                   | -                         |
| $\text{TaS}_2/\text{BC}$ (10:3)   | 23.95                   | -                         |
| $\text{TaS}_2/\text{BC}$ (10:4)   | 29.15                   | -                         |
| $\text{TaS}_2/\text{BC}$ (10:5)   | 33.22                   | -                         |
| $\text{TaS}_2/\text{ANFs}$ (10:1) | -                       | 5.27                      |
| $\text{TaS}_2/\text{ANFs}$ (10:2) | -                       | 15.06                     |
| $\text{TaS}_2/\text{ANFs}$ (10:3) | -                       | 21.27                     |
| $\text{TaS}_2/\text{ANFs}$ (10:4) | -                       | 26.91                     |
| $\text{TaS}_2/\text{ANFs}$ (10:5) | -                       | 33.01                     |

**Table S3** Thickness and mechanical properties of the  $\text{TaS}_2$  freestanding,  $\text{TaS}_2/\text{BC}$  and  $\text{TaS}_2/\text{ANFs}$  films

| <b>Sample</b>                     | <b>Thickness (<math>\mu\text{m}</math>)</b> | <b>Tensile strength (MPa)</b> | <b>Strain to failure (%)</b> | <b>Young's modulus (GPa)</b> | <b>Toughness (<math>\text{MJ m}^{-3}</math>)</b> |
|-----------------------------------|---------------------------------------------|-------------------------------|------------------------------|------------------------------|--------------------------------------------------|
| $\text{TaS}_2$ film               | 3.1                                         | 23.3±4.8                      | 0.21±0.07                    | 14.9±6.2                     | 0.033±0.018                                      |
| $\text{TaS}_2/\text{BC}$ (10:1)   | 9.9                                         | 31.7±2.8                      | 0.45±0.08                    | 8.7±0.9                      | 0.066±0.017                                      |
| $\text{TaS}_2/\text{BC}$ (10:2)   | 10.2                                        | 58.7±7.7                      | 0.72±0.17                    | 12.9±3.8                     | 0.19±0.02                                        |
| $\text{TaS}_2/\text{BC}$ (10:3)   | 15.6                                        | 74.5±3.3                      | 0.76±0.16                    | 15.5±2.4                     | 0.31±0.05                                        |
| $\text{TaS}_2/\text{BC}$ (10:4)   | 17.8                                        | 105.5±7.9                     | 1.29±0.41                    | 14.0±4.8                     | 0.83±0.25                                        |
| $\text{TaS}_2/\text{BC}$ (10:5)   | 24.18                                       | 87.9±8.1                      | 5.48±0.19                    | 4.9±0.6                      | 3.25±0.45                                        |
| $\text{TaS}_2/\text{ANFs}$ (10:1) | 10.0                                        | 40.7±0.8                      | 0.63±0.02                    | 8.09±0.31                    | 0.134±0.009                                      |
| $\text{TaS}_2/\text{ANFs}$ (10:2) | 13.3                                        | 68.2±5.8                      | 1.68±0.22                    | 7.11±0.43                    | 0.72±0.19                                        |
| $\text{TaS}_2/\text{ANFs}$ (10:3) | 15.2                                        | 81.9±1.0                      | 1.94±0.42                    | 8.10±0.98                    | 1.02±0.23                                        |
| $\text{TaS}_2/\text{ANFs}$ (10:4) | 22.4                                        | 121.4±8.8                     | 3.39±0.61                    | 9.60±1.04                    | 2.93±0.85                                        |
| $\text{TaS}_2/\text{ANFs}$ (10:5) | 25.5                                        | 134.13±1.4                    | 4.84±0.27                    | 8.0±1.46                     | 4.52±0.07                                        |

**Table S4** The mechanical properties of the TaS<sub>2</sub>-based films

| Sample                                                    | Tensile strength (MPa) | Strain to failure (%) | Young's modulus (MPa) | Toughness (MJ m <sup>-3</sup> ) | Refs. |
|-----------------------------------------------------------|------------------------|-----------------------|-----------------------|---------------------------------|-------|
| TaS <sub>2</sub> HA <sub>0.371</sub> NMF <sub>0.135</sub> | 9.16                   | -                     | -                     | -                               | [S1]  |
| PEO/TaS <sub>2</sub> (0.5 wt%)                            | 11.27±1.72             | 4.17±0.57             | 632.30±22.45          | -                               | [S2]  |

**Table S5** Interlayer diffraction spacing of TaS<sub>2</sub> freestanding film, TaS<sub>2</sub>/BC and TaS<sub>2</sub>/ANFs composite films

| Sample                        | <i>d</i> (nm) |
|-------------------------------|---------------|
| TaS <sub>2</sub>              | 0.933         |
| TaS <sub>2</sub> /BC (10:1)   | 0.599         |
| TaS <sub>2</sub> /BC (10:2)   | 0.600         |
| TaS <sub>2</sub> /BC (10:3)   | 0.600         |
| TaS <sub>2</sub> /BC (10:4)   | 0.600         |
| TaS <sub>2</sub> /BC (10:5)   | 0.599         |
| TaS <sub>2</sub> /ANFs (10:1) | 0.604         |
| TaS <sub>2</sub> /ANFs (10:2) | 0.604         |
| TaS <sub>2</sub> /ANFs (10:3) | 0.605         |
| TaS <sub>2</sub> /ANFs (10:4) | 0.604         |
| TaS <sub>2</sub> /ANFs (10:5) | 0.604         |

**Table S6** Thickness, density, sheet resistance, electrical conductivity, average EMI SE between 8.2 and 12.4 GHz, and absolute EMI SE (SSE/t) for the TaS<sub>2</sub> freestanding film, TaS<sub>2</sub>/BC, and TaS<sub>2</sub>/ANFs composite films

| Sample                        | Thickness (μm) | Density (g cm <sup>-3</sup> ) | Sheet resistance (Ω sq <sup>-1</sup> ) | Electrical conductivity (S cm <sup>-1</sup> ) | Average EMI SE (dB) | SSE/t (dB cm <sup>2</sup> g <sup>-1</sup> ) |
|-------------------------------|----------------|-------------------------------|----------------------------------------|-----------------------------------------------|---------------------|---------------------------------------------|
| TaS <sub>2</sub>              | 3.1            | 4.84                          | 1.21                                   | 2666                                          | 41.8                | 27,859                                      |
| TaS <sub>2</sub> /BC (10:1)   | 9.9            | 3.52                          | 0.704                                  | 1435                                          | 48.0                | 13,774                                      |
| TaS <sub>2</sub> /BC (10:2)   | 10.2           | 3.44                          | 0.725                                  | 1352                                          | 47.4                | 13,509                                      |
| TaS <sub>2</sub> /BC (10:3)   | 15.6           | 2.41                          | 0.724                                  | 886                                           | 46.9                | 12,527                                      |
| TaS <sub>2</sub> /BC (10:4)   | 17.8           | 2.58                          | 0.723                                  | 777                                           | 46.9                | 10,213                                      |
| TaS <sub>2</sub> /BC (10:5)   | 24.18          | 2.56                          | 0.617                                  | 670                                           | 46.8                | 7,560                                       |
| TaS <sub>2</sub> /ANFs (10:1) | 10.0           | 3.30                          | 0.659                                  | 1517                                          | 46.8                | 14,182                                      |

|                                  |      |      |      |     |      |        |
|----------------------------------|------|------|------|-----|------|--------|
| TaS <sub>2</sub> /ANFs<br>(10:2) | 13.3 | 3.09 | 1.13 | 665 | 44.6 | 10,852 |
| TaS <sub>2</sub> /ANFs<br>(10:3) | 15.2 | 2.75 | 1.94 | 339 | 41.6 | 9,952  |
| TaS <sub>2</sub> /ANFs<br>(10:4) | 22.4 | 2.57 | 2.29 | 195 | 40.1 | 6,966  |
| TaS <sub>2</sub> /ANFs<br>(10:5) | 25.5 | 2.66 | 4.55 | 86  | 39.2 | 5,779  |

**Table S7** Comparison on electrical conductivity of TaS<sub>2</sub> samples.

| Sample                                                    | Conductivity (S m <sup>-1</sup> )                    | Refs.            |
|-----------------------------------------------------------|------------------------------------------------------|------------------|
| TaS <sub>2</sub>                                          | $6.18 \times 10^3$                                   | [S3]             |
| Pd <sub>0.1</sub> TaS <sub>2</sub>                        | $1.36 \times 10^4$                                   |                  |
| single-crystal 2H-TaS <sub>2</sub>                        | $6.8 \times 10^4$                                    | [S4]             |
| 2H-TaS <sub>2</sub> flakes                                | $3.33 \times 10^6$ (in-plane)<br>12.5 (out-of-plane) | [S5]             |
| Li <sub>0.2</sub> TaS <sub>2</sub>                        | $>10^5$                                              | [S6]             |
| Li <sub>0.2</sub> (PEO) <sub>1.36</sub> TaS <sub>2</sub>  | 1,900                                                |                  |
| Li <sub>0.2</sub> (PEO) <sub>1.68</sub> TaS <sub>2</sub>  | 300                                                  |                  |
| Li <sub>0.2</sub> (PVP) <sub>0.95</sub> TaS <sub>2</sub>  | 3,100                                                |                  |
| Li <sub>0.2</sub> (PEI) <sub>0.82</sub> TaS <sub>2</sub>  | 12,500                                               |                  |
| TaS <sub>2</sub> HA <sub>0.371</sub> NMF <sub>0.135</sub> | $1.1738 \times 10^5$                                 | [S1]             |
| TaS <sub>2</sub> freestanding film                        | $2.666 \times 10^5$                                  | <b>This work</b> |

**Table S8** Thickness, EMI SE, and absolute EMI SE (SSE/t) of TaS<sub>2</sub>-based films and other solid shielding films, including graphene, CNT, metal foils, MXene, TMTs, and TMDs

| Type           | Materials                     | Thickness (mm) | EMI SE (dB) | SSE/t (dB cm <sup>2</sup> g <sup>-1</sup> ) | Refs. |
|----------------|-------------------------------|----------------|-------------|---------------------------------------------|-------|
| Graphene-based | Graphene foam                 | 0.027          | 68          | 14,309.8                                    | [S7]  |
|                | Graphene film                 | 0.0084         | 20          | 13,200                                      | [S8]  |
|                | Graphene paper                | 0.05           | 62          | 18,235                                      | [S9]  |
|                | Graphene membrane             | 1.5            | 38          | 70,371                                      | [S10] |
| CNT-based      | CNT                           | 0.00185        | 51          | 199,100                                     | [S11] |
|                | CNT/Aramid Nanofiber          | 0.568          | 41.9        | 18,304.6                                    | [S12] |
|                | CNT/Graphene Edge hybrid foam | 1.6            | 47          | 33,005.6                                    | [S13] |

|             |                       |        |       |         |                  |
|-------------|-----------------------|--------|-------|---------|------------------|
|             | CNT sponge            | 1.8    | 54.8  | 30,444  | [S14]            |
| Metal-based | Al Foil               | 0.008  | 66    | 30,555  | [S15]            |
|             | Cu Foil               | 0.001  | 70    | 7,812   |                  |
|             | AgNWs/EPM             | 1      | 111.5 | 13,433  | [S16]            |
| MXene-based | MXene film            | 0.011  | 68    | 25,863  | [S15]            |
|             | MXene/SA              | 0.008  | 57    | 30,830  |                  |
|             | MXene                 | 0.006  | 32    | 137,000 | [S17]            |
|             | MXene                 | 0.0034 | 60.9  | 60,309  | [S18]            |
| TMTs-based  | SA/TaSe <sub>3</sub>  | 0.027  | 21    | 4,115   | [S19]            |
| TMDs-based  | TaS <sub>2</sub>      | 0.022  | 31    | ~1,200  | [S1]             |
|             | TaS <sub>2</sub> film | 0.0031 | 41.8  | 27,859  | <b>This work</b> |

## Supplementary References

[S1] P. A. Zong, D. Yoo, P. Zhang, Y. Wang, Y. Huang et al., Flexible foil of hybrid TaS<sub>2</sub>/organic superlattice: Fabrication and electrical properties. *Small* **16**(15), e1901901 (2020). <https://doi.org/10.1002/sml.201901901>

[S2] J. Shen, J. Wu, M. Wang, P. Dong, J. Xu et al., Surface tension components based selection of cosolvents for efficient liquid phase exfoliation of 2D materials. *Small* **12**(20), 2741-2749 (2016). <https://doi.org/10.1002/sml.201503834>

[S3] D. Wang, X. Wang, Y. Lu, C. S. Song, J. Pan et al., Atom-scale dispersed palladium in a conductive Pd<sub>0.1</sub>TaS<sub>2</sub> lattice with a unique electronic structure for efficient hydrogen evolution. *J. Mater. Chem. A* **5**(43), 22618-22624 (2017). <https://doi.org/10.1039/c7ta06447k>

[S4] L. Li, X. Deng, Z. Wang, Y. Liu, M. Abeykoon et al., Superconducting order from disorder in 2H-TaSe<sub>2-x</sub>S<sub>x</sub>. *npj Quantum Mater.* **2**(1), (2017). <https://doi.org/10.1038/s41535-017-0016-9>

[S5] Y. Y. Liu, J. J. Wu, K. P. Hackenberg, J. Zhang, Y. M. Wang et al., Self-optimizing, highly surface-active layered metal dichalcogenide catalysts for hydrogen evolution. *Nat. Energy* **2**(9), 17127 (2017). <https://doi.org/10.1038/nenergy.2017.127>

[S6] L. Wang, M. G. Kanatzidis, Laminated TaS<sub>2</sub>/polymer nanocomposites through encapsulative precipitation of exfoliated layers. *Chem. Mater.* **13**(10), 3717-3727 (2001). <https://doi.org/10.1021/cm011025f>



- [S7] E. Zhou, J. Xi, Y. Liu, Z. Xu, Y. Guo et al., Large-area potassium-doped highly conductive graphene films for electromagnetic interference shielding. *Nanoscale* **9**(47), 18613-18618 (2017). <https://doi.org/10.1039/c7nr07030f>
- [S8] B. Shen, W. T. Zhai, W. G. Zheng, Ultrathin flexible graphene film: An excellent thermal conducting material with efficient EMI shielding. *Adv. Funct. Mater.* **24**(28), 4542-4548 (2014). <https://doi.org/10.1002/adfm.201400079>
- [S9] L. Zhang, N. T. Alvarez, M. X. Zhang, M. Haase, R. Malik et al., Preparation and characterization of graphene paper for electromagnetic interference shielding. *Carbon* **82**, 353-359 (2015). <https://doi.org/10.1016/j.carbon.2014.10.080>
- [S10] X. M. Yin, H. J. Li, L. Y. Han, J. C. Meng, J. H. Lu et al., Lightweight and flexible 3D graphene microtubes membrane for high-efficiency electromagnetic-interference shielding. *Chem. Eng. J.* **387**, 124025 (2020). <https://doi.org/10.1016/j.cej.2020.124025>
- [S11] Y. J. Wan, X. Y. Wang, X. M. Li, S. Y. Liao, Z. Q. Lin et al., Ultrathin densified carbon nanotube film with "metal-like" conductivity, superior mechanical strength, and ultrahigh electromagnetic interference shielding effectiveness. *ACS Nano* **14**(10), 14134-14145 (2020). <https://doi.org/10.1021/acsnano.0c06971>
- [S12] P. Hu, J. Lyu, C. Fu, W. B. Gong, J. Liao et al., Multifunctional aramid nanofiber/carbon nanotube hybrid aerogel films. *ACS Nano* **14**(1), 688-697 (2020). <https://doi.org/10.1021/acsnano.9b07459>
- [S13] Q. Song, F. Ye, X. Yin, W. Li, H. Li et al., Carbon nanotube-multilayered graphene edge plane core-shell hybrid foams for ultrahigh-performance electromagnetic-interference shielding. *Adv. Mater.* **29**(31), 1701583 (2017). <https://doi.org/10.1002/adma.201701583>
- [S14] D. W. Lu, Z. C. Mo, B. H. Liang, L. L. Yang, Z. F. He et al., Flexible, lightweight carbon nanotube sponges and composites for high-performance electromagnetic interference shielding. *Carbon* **133**, 457-463 (2018). <https://doi.org/10.1016/j.carbon.2018.03.061>
- [S15] F. Shahzad, M. Alhabeb, C. B. Hatter, B. Anasori, S. Man Hong et al., Electromagnetic interference shielding with 2D transition metal carbides (MXenes). *Science* **353**(6304), 1137-1140 (2016). <https://doi.org/10.1126/science.aag2421>
- [S16] J. Wei, Z. Lin, Z. Lei, Y. Xu, Z. Zhao et al., Lightweight and highly compressible expandable polymer microsphere/silver nanowire composites for wideband electromagnetic interference shielding. *ACS Appl. Mater. Interfaces* **14**(4), 5940-5950 (2022). <https://doi.org/10.1021/acsnano.9b07459>
- [S17] J. Liu, H. B. Zhang, R. Sun, Y. Liu, Z. Liu et al., Hydrophobic, flexible, and lightweight MXene foams for high-performance electromagnetic-interference shielding. *Adv. Mater.* **29**(38), 1702367 (2017). <https://doi.org/10.1002/adma.201702367>
- [S18] S. Wan, X. Li, Y. Chen, N. Liu, Y. Du et al., High-strength scalable mxene films through bridging-induced densification. *Science* **374**(6563), 96-99 (2021).

<https://doi.org/10.1126/science.abg2026>

[S19] Z. Barani, F. Kargar, Y. Ghafouri, S. Ghosh, K. Godziszewski et al., Electrically insulating flexible films with quasi-1D van der waals fillers as efficient electromagnetic shields in the ghz and sub-thz frequency bands. *Adv. Mater.* **33**(11), e2007286 (2021).

<https://doi.org/10.1002/adma.202007286>
